# Supplementary figures and images for: Some people living with HIV might need to pay attention to their mental health during the COVID‐19 two years pandemic in Tokyo until the Omicron variant occur
Source: PubMed Central journal article supplement — PCN Rep. 2023 Jan 17;2(1):e73. doi: 10.1002/pcn5.73 (PMC11114369; doi:10.1002/pcn5.73), 2023-01-17

**Figure S1.**

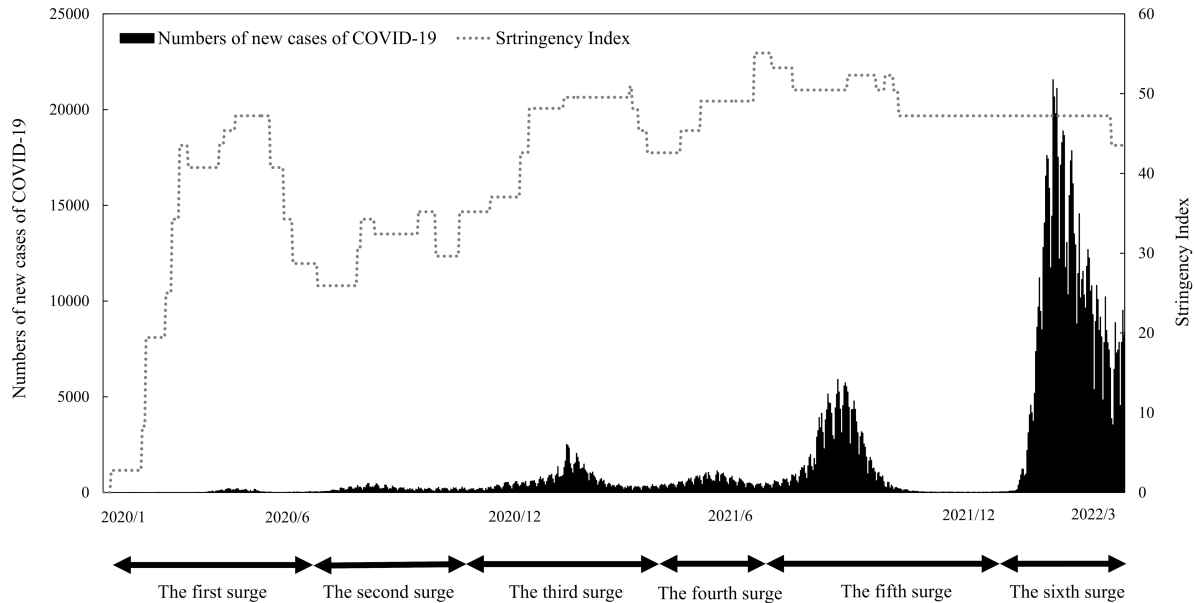

Supplement: PCN5-2-e73-s001.pdf [file PCN5-2-e73-s001.pdf]
